# Supplementary material
Source: publisher figshare collection journal article supplement (https://gsajournals.figshare.com/ndownloader/files/17284181)
Supplement: Supplementary file 1 [file 17284181]

## Sheet: Sheet1
Supplemental Material, Table S1. Reported escapee genes in mice
	Calabres et al., 2012	Berletch et al., 2011	Yang et al., 2010	Marks et al., 2015	Splinter et al., 2011	Lopes et al., 2011	Pinter et al., 2012	Li et al., 2012
1810030O07Rik			*	*	*		*
5430427O19Rik		*
5530601H04Rik		*		*		*	*
5730416F02Rik		*
A230072C01Rik				*
Akap17b					*
Alg13		*
Ap1s2	*
Araf				*
AU015836		*
AU022751		*
Bgn		*	*				*
Bmp15		*
Car5b		*	*				*
Cdk16				*	*
Cfp		*
Chm				*	*
Cybb		*
Ddx3x		*	*	*	*		*
Dmd	*
Ebp				*
Eda2r				*
Eif2s3x	*	*	*		*		*	*
Ercc6l	*			*
F8	*
Fam199x		*
Figf				*
Firre		*	*	*	*		*
Flna		*
Fmr1				*	*
Ftsj1				*
Ftx		*		*			*
Gdi1		*
Gpkow				*
Gpm6b		*		*
Gprasp1	*	*
Gripap1				*
Hcfc1				*	*
Hdac6				*
Jpx				*			*
Kdm5c	*	*	*	*	*	*	*	*
Kdm6a	*	*	*	*	*		*	*
Kif4		*
Lamp2		*
Mecp2				*
Med14				*
Mid1	*		*	*	*		*
Mmgt1				*
Ndufb11				*
Nkap	*			*	*
Ofd1				*
Ogt	*			*	*
Pbdc1	*	*	*	*	*	*	*	*
Pdha1		*
Plp1		*
Rbm3				*
Rbm3os				*
Rbm41				*
Rlim		*
Rnf128	*	*
Rps4x	*
Sh3bgrl		*
Shroom4			*				*
Siah1b	*			*
Slc16a2		*
Slc35a2				*
Sox3				*
Ssxb3	*
Suv39h1					*
Syap1	*
Syp		*
Taf1	*			*	*
Tfe3				*
Timm17b				*
Tmem164		*
Tmem29		*
Tmem47		*						*
Tmsb15l	*
Trmt2b				*
Uba1				*
Usp11				*
Usp9x				*	*
Utp14a	*	*		*				*
Vbp1				*	*
Vsig4		*
Wdr13				*
Wdr45				*
Xist	*	*	*	*	*		*	*
Yipf6	*
Zrsr2	*			*
"*" marks that the gene (row) was reported as an escapee in the reference (column)
